# Supplementary material for: An in silico FSHD muscle fiber for modeling DUX4 dynamics and predicting the impact of therapy
Source: eLife. 2023 May 15;12:e88345. doi: 10.7554/eLife.88345 (PMC10287159; doi:10.7554/eLife.88345)
Supplement: Supplementary file 1. — For each FSHD patient described in the scRNAseq dataset of van den Heuvel et al., 2019, we list sex, diagnosis, genotype, number of DUX4 +ve/-ve cells, and % of DUX4 +ve cells. For patients FSHD1.1 and FSHD2.1 where sufficient data was available, patient-specific estimates of VD are also given. [file elife-88345-supp1.xlsx]

## Sheet: Sheet1
			SMCHD1 mutation
Patient ID	Sex	Diagnosis	cDNA (NM_015295.2) protein (NP_056110.2)	position	D4Z4 short array length	Number of DUX4 positive cells	Number of DUX4 negative cells	%DUX4 +ve	Patient wise V_D
FSHD1.1	M	FSHD1	NA	NA	3A	19	2226	0.00853549	0.00373578
FSHD1.2	F	FSHD1	NA	NA	6A	2	886	0.00225734	NA
FSHD2.1	F	FSHD2	c.4661T>C p.Phe1554Ser	exon 37	12A	5	1283	0.00389712	0.0009595
FSHD2.2	F	FSHD2	c.1302_1306delTGATA p.Tyr434*	exon 10	18A	1	711	0.00140647	NA
