# Supplementary material for: An in silico FSHD muscle fiber for modeling DUX4 dynamics and predicting the impact of therapy
Source: eLife. 2023 May 15;12:e88345. doi: 10.7554/eLife.88345 (PMC10287159; doi:10.7554/eLife.88345)
Supplement: Supplementary file 2. — For each of the eight DUX4 target genes considered the three parameters underlying the promoter switching model (kan/δn,kin/δn, and v0n/δn) derived from DUX4 +ve and DUX4-ve cells separately for patients FSHD1.1 and FSHD2.1 separately are presented. [file elife-88345-supp2.xlsx]

## Sheet: Sheet1
	Patient FSHD1.1						Patient FSHD2.1
	DUX4 +ve cells			DUX4 -ve cells			DUX4 +ve cells			DUX4 -ve cells
DUX4 target gene	v0/d	ka/d	ki/d	v0/d	ka/d	ki/d	v0/d	ka/d	ki/d	v0/d	ka/d	ki/d
PRAMEF12	Inference failed for PRAMEF12 gene						1.59369	1.47056e-07	1.45822e-07	16.4565	0.000933484	1.01593
PRAMEF1	45.1876	0.0109086	0.161156	15.5229	0.000708884	0.749776	10.0006	1.80579e-07	7.51882e-07	48.5162	0.000734247	0.624291
PRAMEF2	Inference failed for PRAMEF2 gene						0.397862	1.00249	1.00086	4.85032	0.000325787	0.179774
TRIM43	6442.9	0.150552	1023.72	6312.12	0.00319608	1016.72	4.42151	0.458452	0.804746	9068.5	0.00341691	1016.83
RFPL4B	150.855	0.0741913	0.678221	6644.05	0.00544409	459.147	79.2077	0.128161	0.332645	85.4937	0.00121709	0.927089
ZSCAN4	78.1709	0.0589128	0.269853	5649.1	0.00721447	1017.94	53.3074	0.138638	0.350373	109.118	0.00238315	1.55158
RFPL1	Inference failed for RFPL1 gene						27.9994	1.32562e-07	5.59979e-07	17.7382	0.000526399	0.335356
RFPL2	4.96435	7.41995e-08	1.49387e-06	1536.17	0.00134041	78.9781	Inference failed for RFPL2 gene
